# Supplementary material
Source: PubMed Central journal article supplement (PMC7685238)
Supplement: NIHMS1638973-supplement-2.pdf [file NIHMS1638973-supplement-2.pdf]

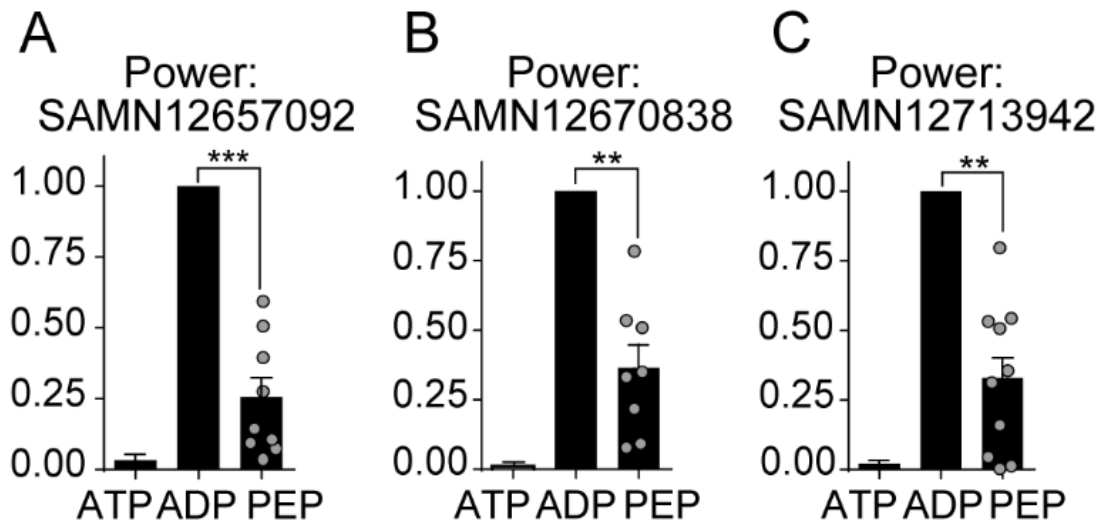

**Figure S1. Membrane-associated PK is sufficient to close  $K_{ATP}$  channels in human islets, Related to Figure 1**

(A-C) Analysis of  $K_{ATP}$  channel closure in terms of power for each human islet donor. Data are shown as mean  $\pm$  SEM. \*\* $P < 0.01$ , \*\*\* $P < 0.001$  by 1-way ANOVA.

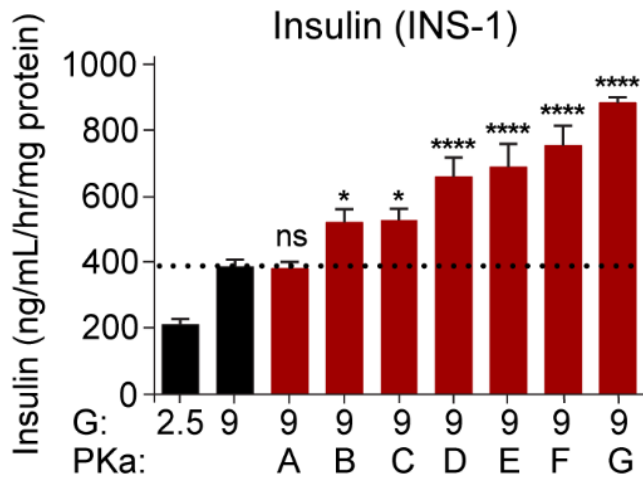

**Figure S2. PK activators stimulate insulin secretion in INS-1 cells, Related to Figure 2**

Effect of various PK activators on the average insulin secretion of INS-1 cells in a static incubation in 9 mM glucose (9G). A, 10  $\mu$ M NIH NCGC185916-06 (Dasa-58); B, 10  $\mu$ M NIH NCGC188799-02; C, 10  $\mu$ M TEPP-46; D, 10  $\mu$ M NIH NCGC186527-05; E, 10  $\mu$ M NIH NCGC181801-02; F, 10  $\mu$ M NIH NCGC188795-01; G, 10  $\mu$ M NIH NCGC183333-05.

Data points represent the mean of 6 technical replicates for each experiment and are shown as mean  $\pm$  SEM. \* $P < 0.05$ , \*\*\*\* $P < 0.0001$  by 1-way ANOVA.

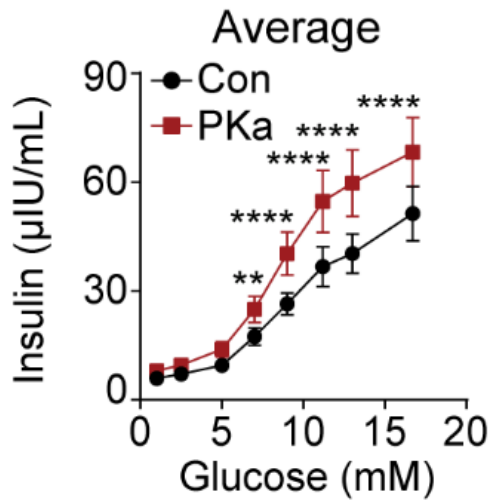

**Figure S3. PK activators enhance average insulin secretion from healthy human islets, Related to Figure 2**

Average insulin secretion in the absence or presence of PKa from all 10 donors from Figure 3 in static incubation assays.

Data points represent the mean of 4 technical replicates and are shown as mean  $\pm$  SEM. \*\* $P < 0.01$ , \*\*\*\* $P < 0.0001$  by 1-way ANOVA.

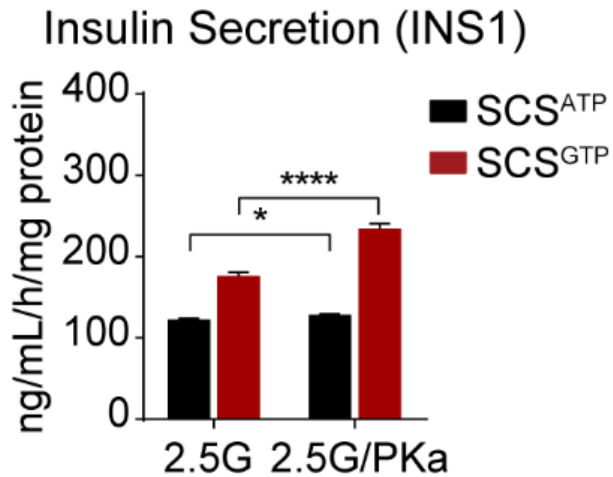

**Figure S4. PK activation in INS1 832/13 cells overexpressing ATP and GTP-producing isoforms of succinyl CoA synthetase slightly elevates insulin secretion, Related to Figure 6**  
Insulin secretion from PK $\alpha$ - or vehicle-treated INS1 832/13 cells stably overexpressing the ATP and GTP-producing isoforms of succinyl CoA synthetase (SCS<sup>ATP</sup> and SCS<sup>GTP</sup>, respectively) ( $n = 6$ ) in response to 2.5 mM glucose (2.5G).  
Data are shown as mean  $\pm$  SEM. \* $P < 0.05$ , \*\*\*\* $P < 0.0001$  by t-test.

| <b>Donor</b>          | <b>Age<br/>(years)</b> | <b>Sex</b> | <b>BMI</b> | <b>HbA1c<br/>%</b> |
|-----------------------|------------------------|------------|------------|--------------------|
| SAMN12657092          | 42                     | F          | 32.7       | N/A                |
| SAMN12670838          | 40                     | M          | 30.7       | N/A                |
| SAMN12713942          | 41                     | M          | 23.5       | N/A                |
| R073                  | 74                     | F          | 28.3       | 5.4                |
| R034                  | 76                     | F          | 23.7       | 5.9                |
| H1009                 | 52                     | M          | 34.2       | N/A                |
| R081                  | 68                     | M          | 23.7       | 5.9                |
| R082                  | 65                     | F          | 24.9       | 5.4                |
| R076                  | 63                     | F          | 26.5       | N/A                |
| H108                  | 32                     | F          | 36.2       | 5.0                |
| CHI 7/29              | 30                     | N/A        | 30         | N/A                |
| R075                  | 27                     | M          | 26.2       | 5.4                |
| R066                  | 44                     | M          | 32.2       | N/A                |
| CHI R34               | 59                     | M          | 20.71      | N/A                |
|                       |                        |            |            |                    |
| <b><i>AVG±SEM</i></b> | 50.9±4.4               |            | 28.11±1.25 | 5.60±0.17          |

**Table S1. Human Islet Donors, Related to Figures 1-4**

Summary characteristics of donors studied. BMI – Body Mass Index, HbA1c – glycated hemoglobin.

| <b>Amino acid</b> | <b>Concentration at 1x (<math>\mu\text{M}</math>)</b> |
|-------------------|-------------------------------------------------------|
| Alanine           | 2100                                                  |
| Glutamine         | 600                                                   |
| Glycine           | 700                                                   |
| Valine            | 550                                                   |
| Leucine           | 500                                                   |
| Serine            | 350                                                   |
| Arginine          | 200                                                   |
| Lysine            | 218                                                   |
| Threonine         | 121                                                   |

**Table S2. Physiological amino acid mixture concentrations, Related to Figure 4**
